# Supplementary material
Source: MDPI journal article supplement (https://www.mdpi.com/2075-163X/11/10/1146)
Supplement: s1 [file s1]

| <b>Description</b>        | <b>Sequence reads</b>                                                                                                                                                                                                                                                      | <b>Highly similar sequence in the NCBI database<br/>(accession no., % similarity)</b> | <b>Sequence Read Run<br/>(SRR)</b> |
|---------------------------|----------------------------------------------------------------------------------------------------------------------------------------------------------------------------------------------------------------------------------------------------------------------------|---------------------------------------------------------------------------------------|------------------------------------|
| <i>Hydrogenophaga</i> sp. | GTAGGGTGCAAGCGTTAATCGGAATTACTGGGCGTAAAGCGTGCGCAGGCGG<br>TTTTGTAAGACAGGCGTGAAATCCCGGGCTTAACCTGGGAATGCGGTTTGTG<br>ACTGCAAAGCTGGAGTGCGGCAGAGGGGGATGGAATTCGCGTGTAGCAGTG<br>AAATGCGTAGATATGCGGAGGAACACCGATGGCGAAGGCAATCCCTGGGCC<br>TGCACTGACGCTCATGCACGAAAGCGTGGGGAGCAAACAGG    | <i>Hydrogenophaga</i> sp. PBL-H3(B4) ( <a href="#">CP044972</a> , 99.6)               | SRR9202442                         |
| <i>Pedobacter</i> sp.     | GGAGGATCCAAGCGTTATCCGGATTATTGGGTTTAAAGGGTGCGTAGGCGG<br>CTTATTAAGTCAGGGGTGAAAGACGGTGGCTCAACCATCGCAGTGCCCTTGAT<br>ACTGATGAGCTTGAATACACTAGAGGTAGGCGGAATGTGACAAGTAGCGGTG<br>AAATGCATAGATATGTCACAGAACCCGATTGCGAAGGCAGCTTACTATGGTG<br>TCATTGACGCTGAGGCACGAAAGCGTGGGGATCAAACAGG   | <i>Pedobacter</i> sp. strain PAMC 27299 ( <a href="#">MT555397</a> , 99.6)            | SRR9202456                         |
| <i>Nevskia</i> sp.        | AGAGGGTGCTAGCGTTAATCGGATTACTGGGCGTAAAGCGTGCGTAGGCGG<br>TTTGATAAGTCGATTGTGAAAGCCCTGGGCTCAACCTAGGAATTGCGGTCGAT<br>ACTGTCAGACTAGAAAACGGTAGAGGGAGGCGGAACCTCAGGTGTAGCGGTG<br>AAATGCGTAGATATCTGGAAGAACACCGATGGCGAAGGCAACCTCCTGGGCC<br>TGTTTTGACGCTGAGGCACGAAAGCGTGGGTAGCAAACAGG  | <i>Nevskia</i> <i>Ramosa</i> strain MAFF 211643 ( <a href="#">AB518684</a> , 99.6)    | SRR9202435                         |
| <i>Rhizobium</i> sp.      | GAAGGGGGCTAGCGTTGTTTCGGAATTACTGGGCGTAAAGCGCACGTAGGCGG<br>ATCGATCAGTCAGGGGTGAAATCCCGCAGCTCAACTGCGGAACCTGCTTTGAT<br>ACTGTCGGTCTAGAGTATGGAAGAGGTGAGTGGAATTCGAGTGTAGAGGTG<br>AAATTCGTAGATATTTCGGAGGAACACCACTGGCGAAGCGGCTCACTGGTCC<br>ATTACTGACGCTGAGGTGCGAAAGCGTGGGGAGCAAACAGG | <i>Rhizobium</i> sp. PN2-B10P5-20 ( <a href="#">MK638398</a> , 100)                   | SRR9202435                         |
| <i>Cladosporium</i> sp.   | CAGCTCCAATAGCGTATATTAAGTTGTTGCAGTTAAAAGCTCGTAGTTGAA<br>CCTTGGGCGTGGCTGGCCGGTCCGCCTCACCGCGTGTACTGGTCCGGCCGGG<br>CCTTTCCTTCTGGGGAACCTCATGCCCTTCACTGGGCGTGTGGGGAACCAAG<br>ACTTTTACTTTGAAAAAATTAGAGTGTTCAAAGCAGGCCTTTGCTCGAATACAT<br>TAGCATGGAATAATAGAATAGGACGTGTGGTTCTATTT    | <i>Cladosporium</i> sp. SICAUCC 20-0009 ( <a href="#">MT427736</a> , 99.6)            | SRR9202458                         |
